# Supplementary material for: Potassium limitation of forest productivity – Part 2: CASTANEA-MAESPA-K shows a reduction in photosynthesis rather than a stoichiometric limitation of tissue formation
Source: Copernicus journal article supplement (doi:10.5194/bg-20-3119-2023), 2023-07-31
Supplement: Supplementary file 1 [file bg-20-3119-2023-supplement.pdf]

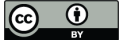

*Supplement of*

**Potassium limitation of forest productivity – Part 2: CASTANEA-MAESPA-K shows a reduction in photosynthesis rather than a stoichiometric limitation of tissue formation**

**Ivan Cornut et al.**

*Correspondence to:* Ivan Cornut (ivan.cornut@cirad.fr)

The copyright of individual parts of the supplement might differ from the article licence.

## 6 Supplementary Material

### 6.1 Parameters

| Parameter                                     | Symbol    | Value | Units                                                               | Source                                                                                   |
|-----------------------------------------------|-----------|-------|---------------------------------------------------------------------|------------------------------------------------------------------------------------------|
| Number of leaves produced by height increment | $\kappa$  | 345   | $\text{nb}_{leaves} \cdot \text{m}^{-2} \cdot \text{m}_{tree}^{-1}$ | Calibrated using leaf production on the +K Itatinga stand                                |
| Leaf Lifespan                                 | $LLS$     | 400   | days                                                                | Calibrated using leaf production, biomass and fall measurements on the +K Itatinga stand |
| Target leaf area                              | $S_{max}$ | 2750  | $\text{mm}^2$                                                       | Measured in scans from the +K stand                                                      |

Table S1: Parameters related to the leaf cohort sub-model that were modified from Part 1

| Parameter                                                     | Symbol               | Value                 | Units                                                 | Source                                                                                   |
|---------------------------------------------------------------|----------------------|-----------------------|-------------------------------------------------------|------------------------------------------------------------------------------------------|
| Sensitivity parameter for soluble sugar allocation            | $p_{ss}$             | 0.1                   | unitless                                              | Assumed                                                                                  |
| Sensitivity parameter for fine roots allocation               | $p_{FR}$             | 0.1                   | unitless                                              | Assumed                                                                                  |
| Conversion from LAI to target root biomass                    | $\lambda$            | 80                    | $\text{gC} \cdot \text{m}_{leaves}^{-2}$              | Calibrated on the +K stand                                                               |
| Optimal wood K concentration at creation                      | $[K]_{Trunk}^{opti}$ | $7.5710^{-3}$         | $\text{gK} \cdot \text{gC}^{-1}$                      | Maximum K wood concentration measured on the +K stand                                    |
| Minimal wood K concentration in a cohort                      | $[K]_{Trunk}^{min}$  | $1.0010^{-3}$         | $\text{gK} \cdot \text{gC}^{-1}$                      | Minimum K wood concentration measured on the +K stand                                    |
| NPP driven rate of remobilisation of K in wood                | $T_{KTrunk}$         | 0.00216               | unitless                                              | Calibrated on K wood concentrations measured on the +K stand                             |
| remobilisation efficiency of K in dying branches              | $R_{KBranches}$      | 0.8                   | unitless                                              | Measured difference in K content between live branches and dead branches in the +K stand |
| Annual turnover rate for branches                             | $M_{Branches}$       | 0.31                  | $\cdot \text{yr}^{-1}$                                | Calculated from biomass and necromass measurements in the +K stand                       |
| Annual turnover rate for fine roots                           | $M_{FR}$             | 0.71                  | $\cdot \text{yr}^{-1}$                                | (Lambais et al., 2017)                                                                   |
| Annual turnover rate for bark                                 | $M_{Bark}$           | 0.001                 | $\cdot \text{yr}^{-1}$                                | Calculated from biomass and necromass measurements in the +K stand                       |
| Exponential factor                                            | $Q_{10}$             | 2                     | unitless                                              | (Ryan et al., 2009)                                                                      |
| Reference Temperature                                         | $T_{MR}$             | 25                    | $^{\circ}\text{C}$                                    | (Ryan et al., 2009)                                                                      |
| Trunk minimum rate of respiration per unit nitrogen           | $R_1^{trunk}$        | $1.69 \times 10^{-3}$ | $\text{gC} \cdot \text{gN}^{-1} \cdot \text{hr}^{-1}$ | modified from Ryan et al. (2009)                                                         |
| Trunk maximum rate of respiration per unit nitrogen           | $R_2^{trunk}$        | $2.63 \times 10^{-2}$ | $\text{gC} \cdot \text{gN}^{-1} \cdot \text{hr}^{-1}$ | modified from Ryan et al. (2009)                                                         |
| Slope between trunk biomass and respiration per unit nitrogen | $R_2^{trunk}$        | $4.18 \times 10^{-6}$ | $\cdot \text{gN}^{-1} \cdot \text{hr}^{-1}$           | modified from Ryan et al. (2009)                                                         |

Table S2: New parameters related to C and K allocation

### 6.2 Figures

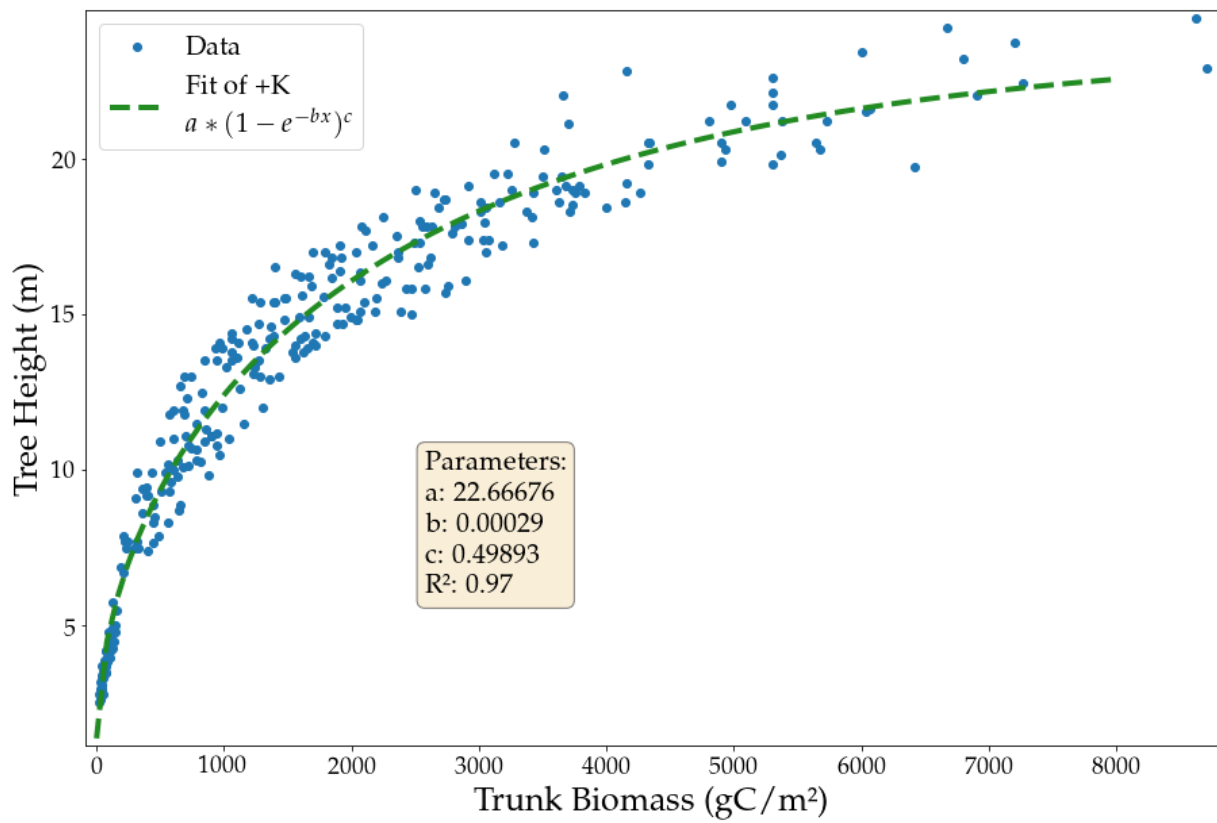

Figure S1: Tree height as a function of trunk biomass. The function was well adjusted.

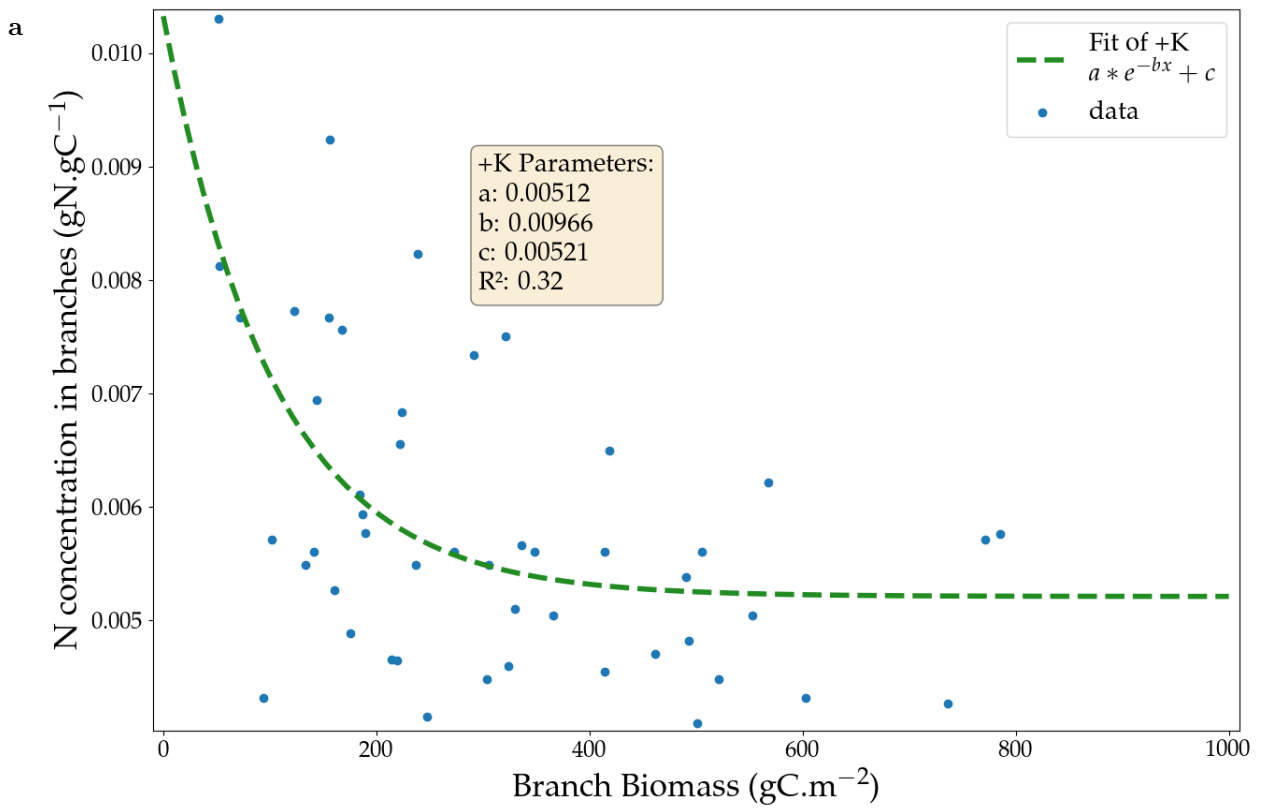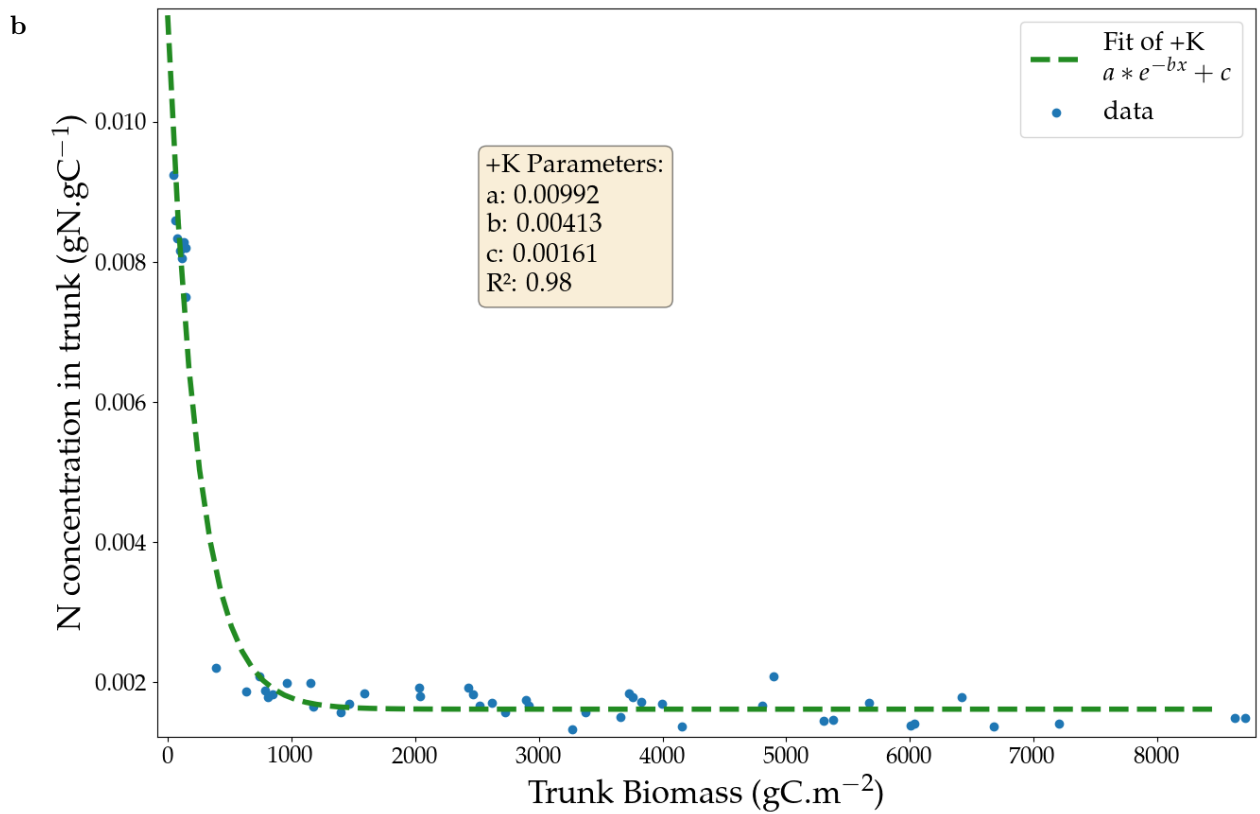

Figure S2: a) Branch N content in function of the biomass of living branches b) The trunk's N content in function of the trunk biomass.

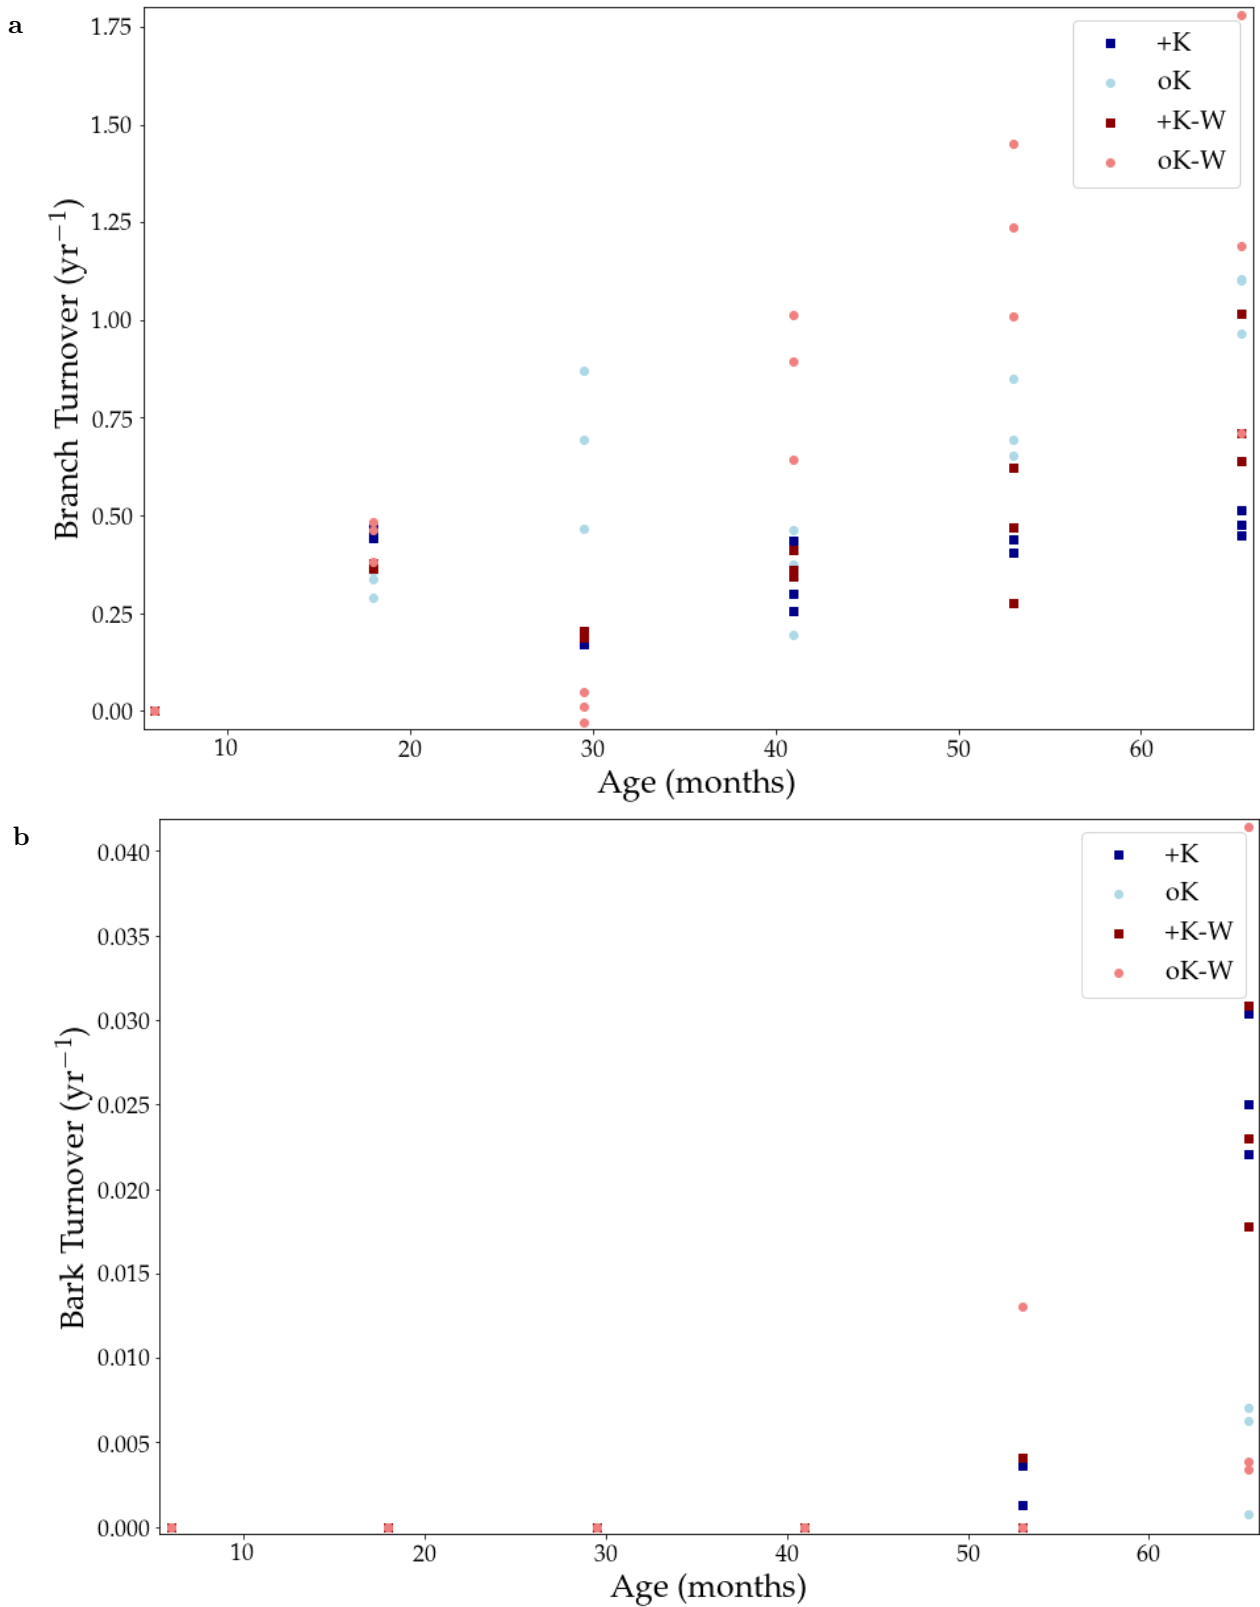

Figure S3: a) Turnover of bark in different fertilisation and rainfall exclusion plots (-W is 30% of rainfall removed). Each data is a separate data point. b) The turnover of branches in the same conditions.

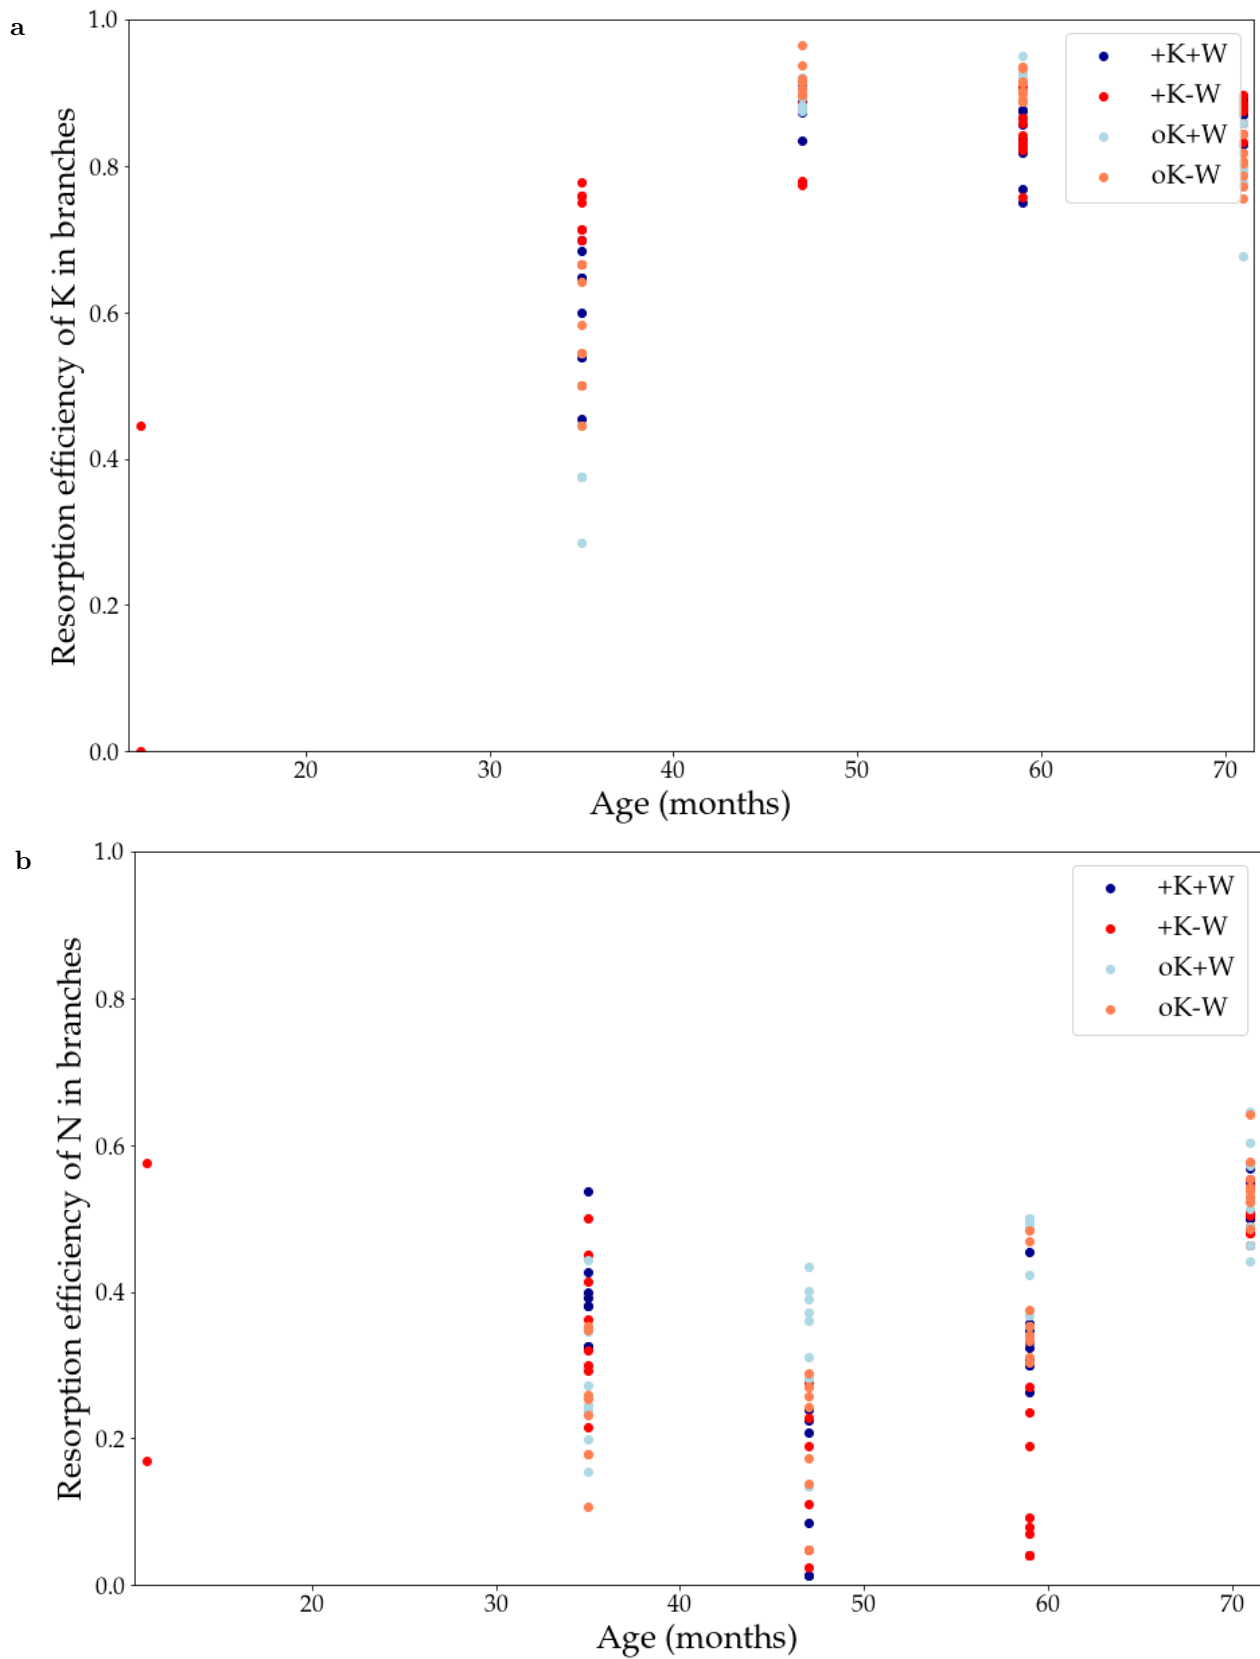

Figure S4: Branch resorption efficiencies for K (a) and N (b) that were calculated using annual measurements of K concentrations of live and dead branches on the same tree. Each data point is a tree in each treatment.

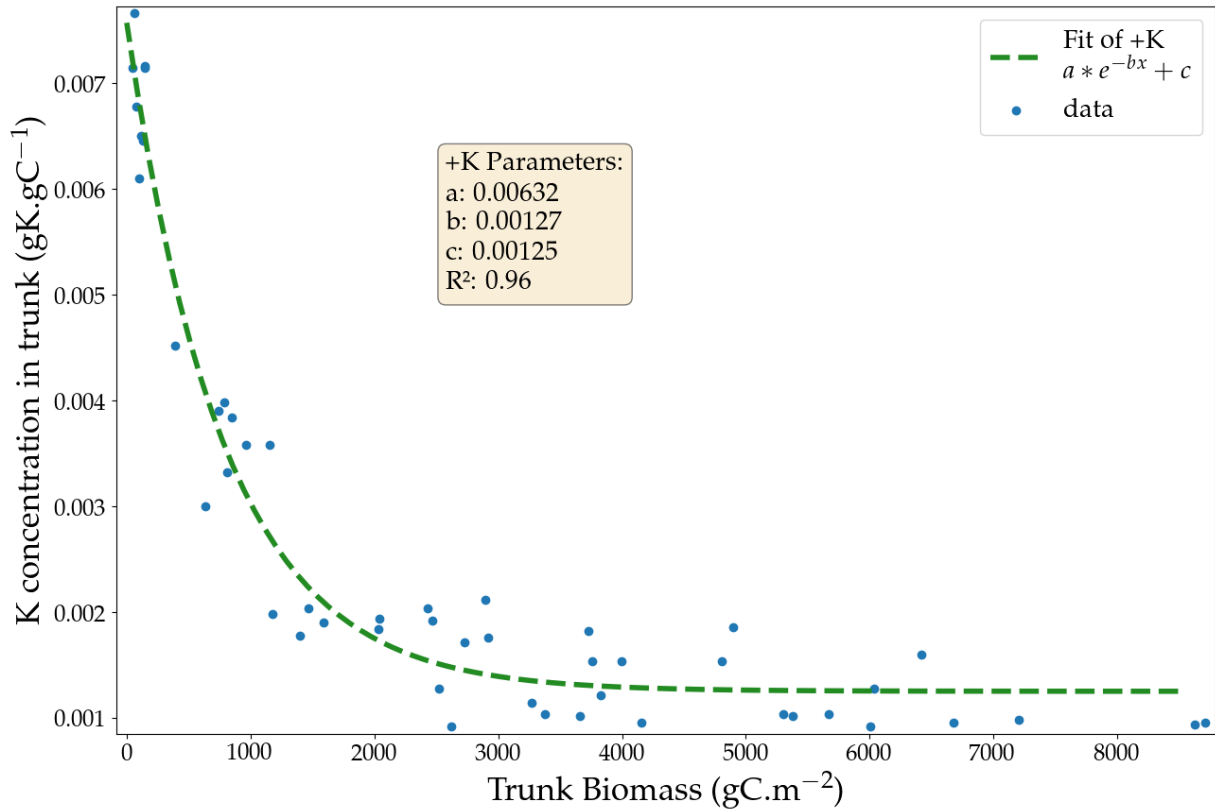

Figure S5: Trunk K content as a function of trunk biomass. A decreasing function was adjusted to the data. This function was not used in the model but the parameters were used to parametrise the K trunk wood cohort model. The non-limited trunk wood concentration at the creation of the cohort was equal to  $a + c$  of the function shown in the inset and the minimal trunk wood K content was similar to  $c$  (but corrected to account for the newly created cohorts in trunk wood).

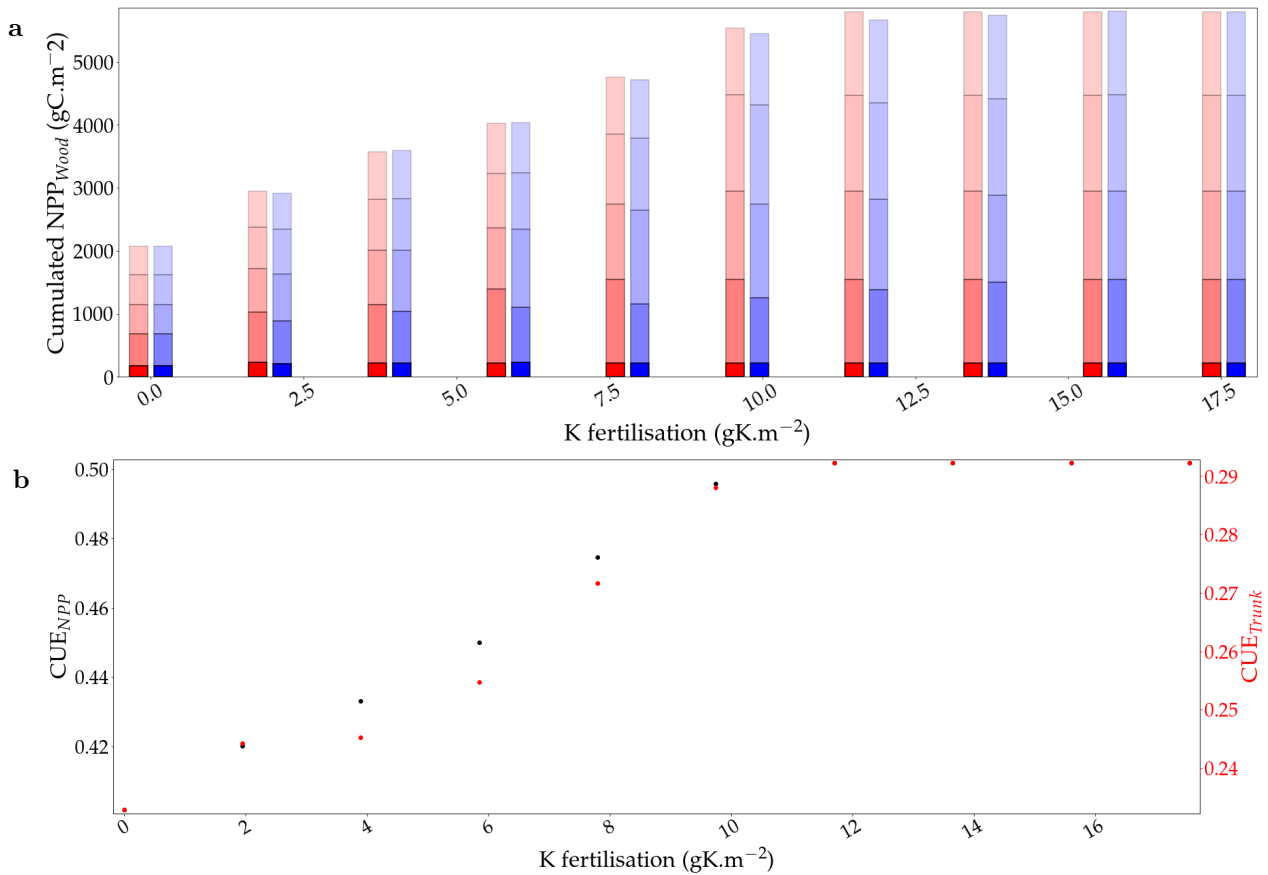

Figure S6: a) The response of cumulated NPP<sub>trunk</sub> to two different fertilisation regimes (applied once at planting in red and over 4 application over the early growth in blue) along a fertilisation gradient. b) The response of NPP CUE and trunk CUE to K fertilisation ranging from 0gK.m<sup>-2</sup> to 17gK.m<sup>-2</sup>

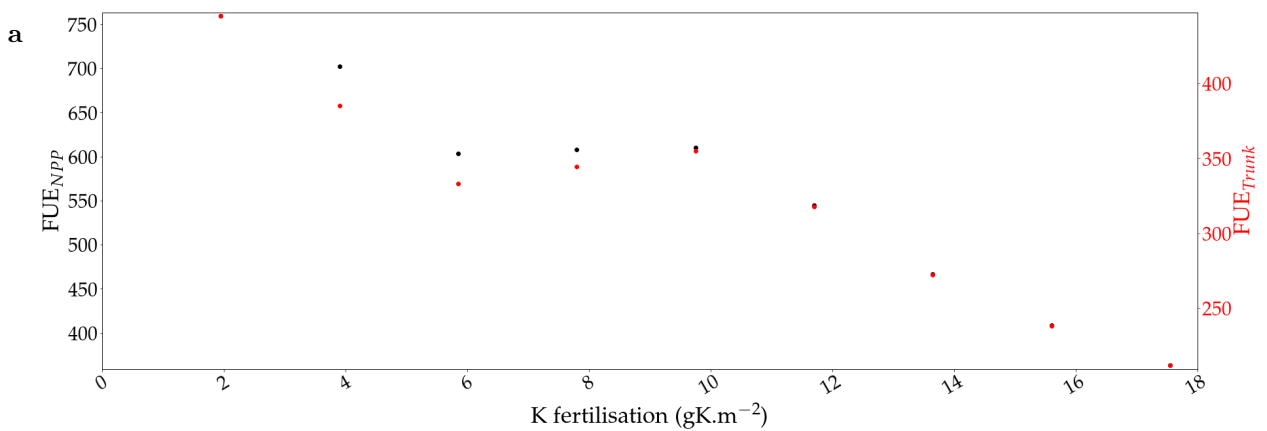

Figure S7: The fertiliser use efficiencies of NPP and of trunk production in function of the fertilisation level of the simulated stand.
